# Supplementary material
Source: Royal Society of Chemistry journal article supplement (doi:10.1039/d6nj01479h)
Supplement: d6nj01479h1.pdf [file d6nj01479h1.pdf]

# Supplementary Information

## Polyfunctional Yb(III) tropolonate complexes: Slow magnetic relaxation and luminescence

Svetlana P. Petrosyants<sup>a</sup>, Alina S. Galkina<sup>a\*</sup>, Andrey B. Ilyukhin<sup>a</sup>, Daria A. Metlina<sup>b</sup>, Nikolay P. Datskevich<sup>b</sup>, Ilya V. Taydakov<sup>b</sup> and Igor L. Eremenko<sup>a</sup>

<sup>a</sup> *N.S. Kurnakov Institute of General and Inorganic Chemistry, Russian Academy of Sciences, Leninsky prosp. 31, 119991 Moscow, Russian Federation*

<sup>b</sup> *P.N. Lebedev Physical Institute of the Russian Academy of Sciences, Leninsky Prosp., 53, 119991 Moscow, Russian Federation*

*\*Corresponding author  
asgalkina@bk.ru*

**Table S1.** Crystal data and structure refinement for **2**.

|                        |                             |
|------------------------|-----------------------------|
| Identification code    | <b>2</b>                    |
| Empirical formula      | $C_{46}H_{34}N_2O_{6.50}Yb$ |
| Formula weight         | 891.81                      |
| Temperature, K         | 296                         |
| Wavelength, Å          | 1.5419                      |
| Crystal system         | monoclinic                  |
| Space group            | <i>C2/c</i>                 |
| a, Å                   | 22.3808(10)                 |
| b, Å                   | 13.42945(62)                |
| c, Å                   | 26.6711(12)                 |
| $\beta$ , °            | 112.9485(24)                |
| Volume, Å <sup>3</sup> | 7381.88(61)                 |
| Z                      | 8                           |
| R <sub>exp</sub>       | 5.53                        |
| R <sub>wp</sub>        | 8.18                        |
| R <sub>p</sub>         | 6.23                        |
| GOF                    | 1.48                        |
| R-Bragg                | 2.70                        |

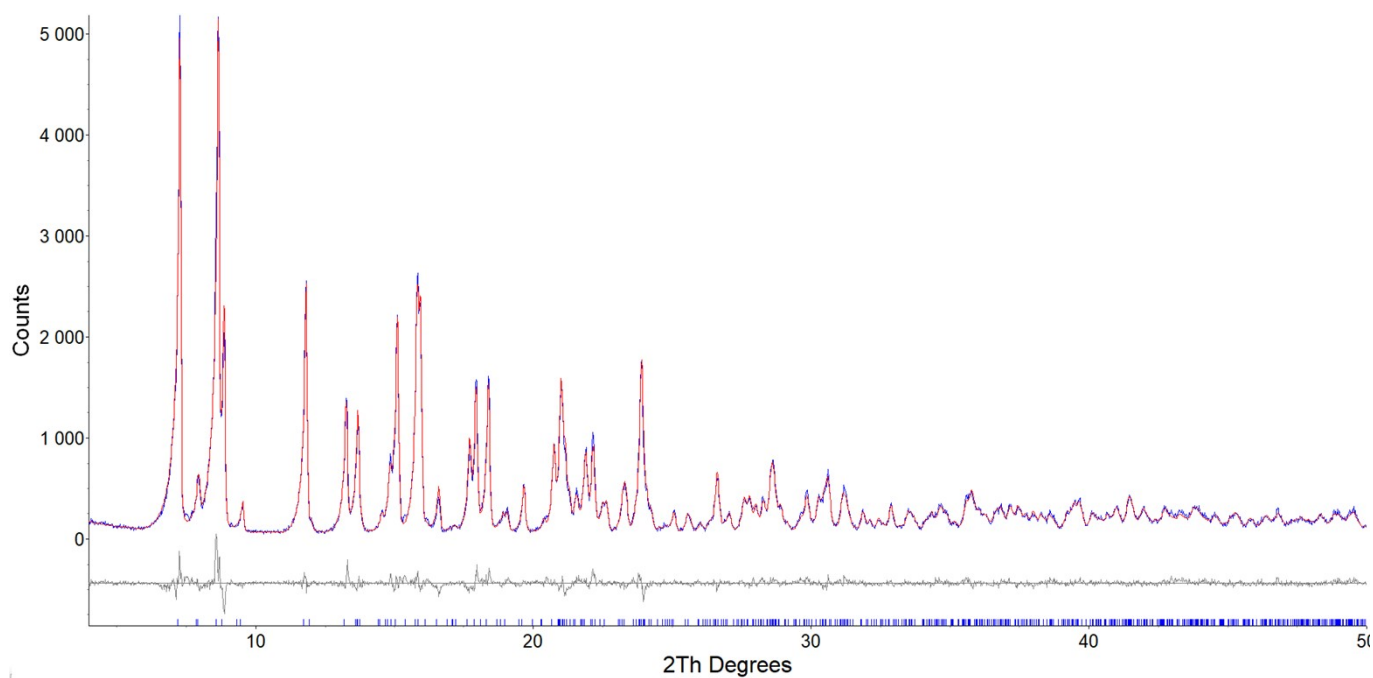

**Fig. S1.** Rietveld refinement profiles for **2**, for room temperature X-ray data. The calculated (for  $[\text{YT}_3(\text{Bath})]\cdot 0.5\text{EtOH}$ ) and experimental (for **2**) profiles are shown with the red and blue line, respectively. The bottom trace shows the difference curve. The vertical bars indicate the calculated positions of the Bragg peaks.

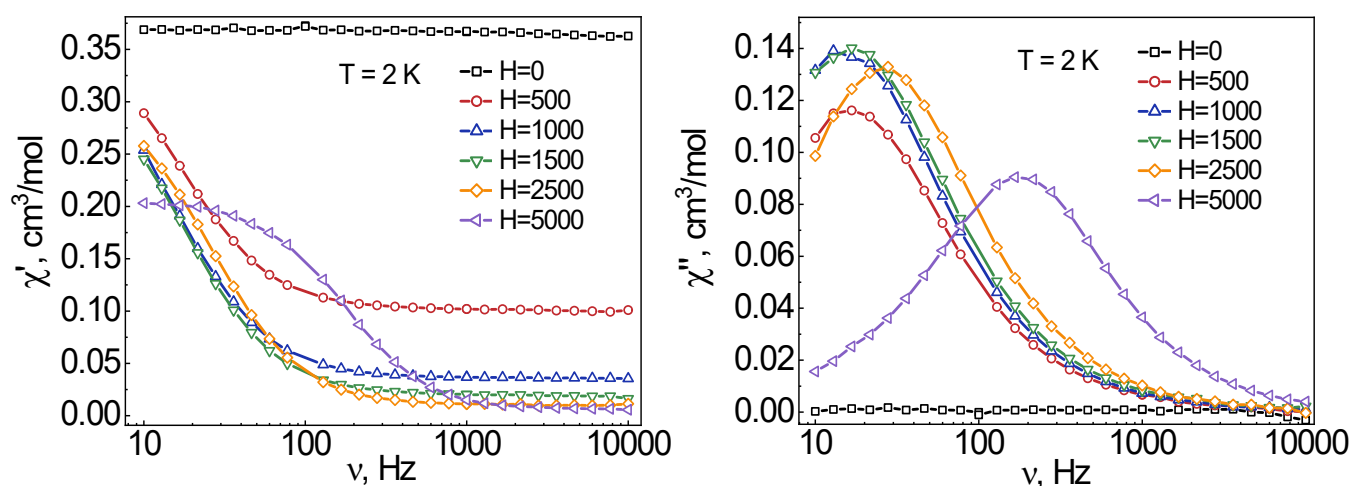

**Fig. S2.** Frequency dependencies of the real  $\chi'$  (left) and imaginary  $\chi''$  (right) parts of the ac-magnetic susceptibility for complex **2** in dc-magnetic fields up to 5000 Oe at 2 K.

**Table S2.** Fitting of the  $\tau$  vs.  $T$  dependences for **2**.

| Dependence of the relaxation time $\tau$ on the reciprocal temperature for complex <b>2</b> ( $H = 1.0$ kOe, $T = 2.00$ - $5.75$ K).                                                                                                                                                                                                                                                                                                                                                                                                                                                                                                                                                                                                                                                                                                                                                                                                                                                                                                                                                                                                                                                                                                                                                                                                                               | Fit function, temperature range, and the best-fit parameters with uncertainties. |                                                |                   |          |  |                                                |      |  |     |         |  |                             |         |  |                       |                 |  |              |                |  |                             |               |  |                        |                                                                                                                                                                                                                                                                                                         |  |               |                |  |                                      |               |  |         |                                                                                                                                                                                                                                                                                                                                    |  |                              |     |  |                        |                 |  |               |                |  |         |               |  |         |                                                                                                                                                                                                                                                                                                                                                                                                                                                                                                                                          |
|--------------------------------------------------------------------------------------------------------------------------------------------------------------------------------------------------------------------------------------------------------------------------------------------------------------------------------------------------------------------------------------------------------------------------------------------------------------------------------------------------------------------------------------------------------------------------------------------------------------------------------------------------------------------------------------------------------------------------------------------------------------------------------------------------------------------------------------------------------------------------------------------------------------------------------------------------------------------------------------------------------------------------------------------------------------------------------------------------------------------------------------------------------------------------------------------------------------------------------------------------------------------------------------------------------------------------------------------------------------------|----------------------------------------------------------------------------------|------------------------------------------------|-------------------|----------|--|------------------------------------------------|------|--|-----|---------|--|-----------------------------|---------|--|-----------------------|-----------------|--|--------------|----------------|--|-----------------------------|---------------|--|------------------------|---------------------------------------------------------------------------------------------------------------------------------------------------------------------------------------------------------------------------------------------------------------------------------------------------------|--|---------------|----------------|--|--------------------------------------|---------------|--|---------|------------------------------------------------------------------------------------------------------------------------------------------------------------------------------------------------------------------------------------------------------------------------------------------------------------------------------------|--|------------------------------|-----|--|------------------------|-----------------|--|---------------|----------------|--|---------|---------------|--|---------|------------------------------------------------------------------------------------------------------------------------------------------------------------------------------------------------------------------------------------------------------------------------------------------------------------------------------------------------------------------------------------------------------------------------------------------------------------------------------------------------------------------------------------------|
| <table border="1" data-bbox="558 481 750 728"> <thead> <tr> <th colspan="2">Model</th> <th>Orbach (User)</th> </tr> </thead> <tbody> <tr> <td>Equation</td> <td></td> <td><math>1/(\tau_0(1 - \exp(-\Delta E/kT)))</math></td> </tr> <tr> <td>Plot</td> <td></td> <td>Tau</td> </tr> <tr> <td>Tau0</td> <td></td> <td><math>4.83038E-8 \pm 1.53144E-5</math></td> </tr> <tr> <td>Urb</td> <td></td> <td><math>10.89933 \pm 0.0936</math></td> </tr> <tr> <td>Reduced Chi-Sqr</td> <td></td> <td><math>2.73192E-7</math></td> </tr> <tr> <td>R-Square (COD)</td> <td></td> <td>0.97085</td> </tr> <tr> <td>Adj. R-Square</td> <td></td> <td>0.96877</td> </tr> </tbody> </table> <table border="1" data-bbox="558 593 750 728"> <thead> <tr> <th colspan="2">Model</th> <th>Orbach (User)</th> </tr> </thead> <tbody> <tr> <td>Equation</td> <td></td> <td><math>1/(\tau_0(1 - \exp(-\Delta E/kT)))</math></td> </tr> <tr> <td>Plot</td> <td></td> <td>Tau</td> </tr> <tr> <td>Tau0</td> <td></td> <td><math>2.47286E-8 \pm 1.99814E-10</math></td> </tr> <tr> <td>Urb</td> <td></td> <td><math>38.18877 \pm 0.12567</math></td> </tr> <tr> <td>Reduced Chi-Sqr</td> <td></td> <td><math>1.49929E-15</math></td> </tr> <tr> <td>R-Square (COD)</td> <td></td> <td>0.99999</td> </tr> <tr> <td>Adj. R-Square</td> <td></td> <td>0.99998</td> </tr> </tbody> </table> | Model                                                                            |                                                | Orbach (User)     | Equation |  | $1/(\tau_0(1 - \exp(-\Delta E/kT)))$           | Plot |  | Tau | Tau0    |  | $4.83038E-8 \pm 1.53144E-5$ | Urb     |  | $10.89933 \pm 0.0936$ | Reduced Chi-Sqr |  | $2.73192E-7$ | R-Square (COD) |  | 0.97085                     | Adj. R-Square |  | 0.96877                | Model                                                                                                                                                                                                                                                                                                   |  | Orbach (User) | Equation       |  | $1/(\tau_0(1 - \exp(-\Delta E/kT)))$ | Plot          |  | Tau     | Tau0                                                                                                                                                                                                                                                                                                                               |  | $2.47286E-8 \pm 1.99814E-10$ | Urb |  | $38.18877 \pm 0.12567$ | Reduced Chi-Sqr |  | $1.49929E-15$ | R-Square (COD) |  | 0.99999 | Adj. R-Square |  | 0.99998 | <p><b>Orbach</b><br/> <math>\tau = \tau_0 \cdot \exp(\Delta E/kT)</math></p> <p><math>T = 5.25</math>-<math>5.75</math> K<br/> <math>\Delta E/k = 38.2 \pm 0.1</math> K<br/> <math>\tau_0 = 2.47 \cdot 10^{-8} \pm 0.06 \cdot 10^{-8}</math> s<br/> <math>R^2 = 0.99999</math> (red line)</p> <p><math>T = 2.00</math>-<math>5.75</math> K<br/> <math>\Delta E/k = 10.9 \pm 0.7</math> K<br/> <math>\tau_0 = 5 \cdot 10^{-5} \pm 2 \cdot 10^{-5}</math> s<br/> <math>R^2 = 0.97085</math> (blue line)<br/> <i>Unsatisfactory fit</i></p> |
| Model                                                                                                                                                                                                                                                                                                                                                                                                                                                                                                                                                                                                                                                                                                                                                                                                                                                                                                                                                                                                                                                                                                                                                                                                                                                                                                                                                              |                                                                                  | Orbach (User)                                  |                   |          |  |                                                |      |  |     |         |  |                             |         |  |                       |                 |  |              |                |  |                             |               |  |                        |                                                                                                                                                                                                                                                                                                         |  |               |                |  |                                      |               |  |         |                                                                                                                                                                                                                                                                                                                                    |  |                              |     |  |                        |                 |  |               |                |  |         |               |  |         |                                                                                                                                                                                                                                                                                                                                                                                                                                                                                                                                          |
| Equation                                                                                                                                                                                                                                                                                                                                                                                                                                                                                                                                                                                                                                                                                                                                                                                                                                                                                                                                                                                                                                                                                                                                                                                                                                                                                                                                                           |                                                                                  | $1/(\tau_0(1 - \exp(-\Delta E/kT)))$           |                   |          |  |                                                |      |  |     |         |  |                             |         |  |                       |                 |  |              |                |  |                             |               |  |                        |                                                                                                                                                                                                                                                                                                         |  |               |                |  |                                      |               |  |         |                                                                                                                                                                                                                                                                                                                                    |  |                              |     |  |                        |                 |  |               |                |  |         |               |  |         |                                                                                                                                                                                                                                                                                                                                                                                                                                                                                                                                          |
| Plot                                                                                                                                                                                                                                                                                                                                                                                                                                                                                                                                                                                                                                                                                                                                                                                                                                                                                                                                                                                                                                                                                                                                                                                                                                                                                                                                                               |                                                                                  | Tau                                            |                   |          |  |                                                |      |  |     |         |  |                             |         |  |                       |                 |  |              |                |  |                             |               |  |                        |                                                                                                                                                                                                                                                                                                         |  |               |                |  |                                      |               |  |         |                                                                                                                                                                                                                                                                                                                                    |  |                              |     |  |                        |                 |  |               |                |  |         |               |  |         |                                                                                                                                                                                                                                                                                                                                                                                                                                                                                                                                          |
| Tau0                                                                                                                                                                                                                                                                                                                                                                                                                                                                                                                                                                                                                                                                                                                                                                                                                                                                                                                                                                                                                                                                                                                                                                                                                                                                                                                                                               |                                                                                  | $4.83038E-8 \pm 1.53144E-5$                    |                   |          |  |                                                |      |  |     |         |  |                             |         |  |                       |                 |  |              |                |  |                             |               |  |                        |                                                                                                                                                                                                                                                                                                         |  |               |                |  |                                      |               |  |         |                                                                                                                                                                                                                                                                                                                                    |  |                              |     |  |                        |                 |  |               |                |  |         |               |  |         |                                                                                                                                                                                                                                                                                                                                                                                                                                                                                                                                          |
| Urb                                                                                                                                                                                                                                                                                                                                                                                                                                                                                                                                                                                                                                                                                                                                                                                                                                                                                                                                                                                                                                                                                                                                                                                                                                                                                                                                                                |                                                                                  | $10.89933 \pm 0.0936$                          |                   |          |  |                                                |      |  |     |         |  |                             |         |  |                       |                 |  |              |                |  |                             |               |  |                        |                                                                                                                                                                                                                                                                                                         |  |               |                |  |                                      |               |  |         |                                                                                                                                                                                                                                                                                                                                    |  |                              |     |  |                        |                 |  |               |                |  |         |               |  |         |                                                                                                                                                                                                                                                                                                                                                                                                                                                                                                                                          |
| Reduced Chi-Sqr                                                                                                                                                                                                                                                                                                                                                                                                                                                                                                                                                                                                                                                                                                                                                                                                                                                                                                                                                                                                                                                                                                                                                                                                                                                                                                                                                    |                                                                                  | $2.73192E-7$                                   |                   |          |  |                                                |      |  |     |         |  |                             |         |  |                       |                 |  |              |                |  |                             |               |  |                        |                                                                                                                                                                                                                                                                                                         |  |               |                |  |                                      |               |  |         |                                                                                                                                                                                                                                                                                                                                    |  |                              |     |  |                        |                 |  |               |                |  |         |               |  |         |                                                                                                                                                                                                                                                                                                                                                                                                                                                                                                                                          |
| R-Square (COD)                                                                                                                                                                                                                                                                                                                                                                                                                                                                                                                                                                                                                                                                                                                                                                                                                                                                                                                                                                                                                                                                                                                                                                                                                                                                                                                                                     |                                                                                  | 0.97085                                        |                   |          |  |                                                |      |  |     |         |  |                             |         |  |                       |                 |  |              |                |  |                             |               |  |                        |                                                                                                                                                                                                                                                                                                         |  |               |                |  |                                      |               |  |         |                                                                                                                                                                                                                                                                                                                                    |  |                              |     |  |                        |                 |  |               |                |  |         |               |  |         |                                                                                                                                                                                                                                                                                                                                                                                                                                                                                                                                          |
| Adj. R-Square                                                                                                                                                                                                                                                                                                                                                                                                                                                                                                                                                                                                                                                                                                                                                                                                                                                                                                                                                                                                                                                                                                                                                                                                                                                                                                                                                      |                                                                                  | 0.96877                                        |                   |          |  |                                                |      |  |     |         |  |                             |         |  |                       |                 |  |              |                |  |                             |               |  |                        |                                                                                                                                                                                                                                                                                                         |  |               |                |  |                                      |               |  |         |                                                                                                                                                                                                                                                                                                                                    |  |                              |     |  |                        |                 |  |               |                |  |         |               |  |         |                                                                                                                                                                                                                                                                                                                                                                                                                                                                                                                                          |
| Model                                                                                                                                                                                                                                                                                                                                                                                                                                                                                                                                                                                                                                                                                                                                                                                                                                                                                                                                                                                                                                                                                                                                                                                                                                                                                                                                                              |                                                                                  | Orbach (User)                                  |                   |          |  |                                                |      |  |     |         |  |                             |         |  |                       |                 |  |              |                |  |                             |               |  |                        |                                                                                                                                                                                                                                                                                                         |  |               |                |  |                                      |               |  |         |                                                                                                                                                                                                                                                                                                                                    |  |                              |     |  |                        |                 |  |               |                |  |         |               |  |         |                                                                                                                                                                                                                                                                                                                                                                                                                                                                                                                                          |
| Equation                                                                                                                                                                                                                                                                                                                                                                                                                                                                                                                                                                                                                                                                                                                                                                                                                                                                                                                                                                                                                                                                                                                                                                                                                                                                                                                                                           |                                                                                  | $1/(\tau_0(1 - \exp(-\Delta E/kT)))$           |                   |          |  |                                                |      |  |     |         |  |                             |         |  |                       |                 |  |              |                |  |                             |               |  |                        |                                                                                                                                                                                                                                                                                                         |  |               |                |  |                                      |               |  |         |                                                                                                                                                                                                                                                                                                                                    |  |                              |     |  |                        |                 |  |               |                |  |         |               |  |         |                                                                                                                                                                                                                                                                                                                                                                                                                                                                                                                                          |
| Plot                                                                                                                                                                                                                                                                                                                                                                                                                                                                                                                                                                                                                                                                                                                                                                                                                                                                                                                                                                                                                                                                                                                                                                                                                                                                                                                                                               |                                                                                  | Tau                                            |                   |          |  |                                                |      |  |     |         |  |                             |         |  |                       |                 |  |              |                |  |                             |               |  |                        |                                                                                                                                                                                                                                                                                                         |  |               |                |  |                                      |               |  |         |                                                                                                                                                                                                                                                                                                                                    |  |                              |     |  |                        |                 |  |               |                |  |         |               |  |         |                                                                                                                                                                                                                                                                                                                                                                                                                                                                                                                                          |
| Tau0                                                                                                                                                                                                                                                                                                                                                                                                                                                                                                                                                                                                                                                                                                                                                                                                                                                                                                                                                                                                                                                                                                                                                                                                                                                                                                                                                               |                                                                                  | $2.47286E-8 \pm 1.99814E-10$                   |                   |          |  |                                                |      |  |     |         |  |                             |         |  |                       |                 |  |              |                |  |                             |               |  |                        |                                                                                                                                                                                                                                                                                                         |  |               |                |  |                                      |               |  |         |                                                                                                                                                                                                                                                                                                                                    |  |                              |     |  |                        |                 |  |               |                |  |         |               |  |         |                                                                                                                                                                                                                                                                                                                                                                                                                                                                                                                                          |
| Urb                                                                                                                                                                                                                                                                                                                                                                                                                                                                                                                                                                                                                                                                                                                                                                                                                                                                                                                                                                                                                                                                                                                                                                                                                                                                                                                                                                |                                                                                  | $38.18877 \pm 0.12567$                         |                   |          |  |                                                |      |  |     |         |  |                             |         |  |                       |                 |  |              |                |  |                             |               |  |                        |                                                                                                                                                                                                                                                                                                         |  |               |                |  |                                      |               |  |         |                                                                                                                                                                                                                                                                                                                                    |  |                              |     |  |                        |                 |  |               |                |  |         |               |  |         |                                                                                                                                                                                                                                                                                                                                                                                                                                                                                                                                          |
| Reduced Chi-Sqr                                                                                                                                                                                                                                                                                                                                                                                                                                                                                                                                                                                                                                                                                                                                                                                                                                                                                                                                                                                                                                                                                                                                                                                                                                                                                                                                                    |                                                                                  | $1.49929E-15$                                  |                   |          |  |                                                |      |  |     |         |  |                             |         |  |                       |                 |  |              |                |  |                             |               |  |                        |                                                                                                                                                                                                                                                                                                         |  |               |                |  |                                      |               |  |         |                                                                                                                                                                                                                                                                                                                                    |  |                              |     |  |                        |                 |  |               |                |  |         |               |  |         |                                                                                                                                                                                                                                                                                                                                                                                                                                                                                                                                          |
| R-Square (COD)                                                                                                                                                                                                                                                                                                                                                                                                                                                                                                                                                                                                                                                                                                                                                                                                                                                                                                                                                                                                                                                                                                                                                                                                                                                                                                                                                     |                                                                                  | 0.99999                                        |                   |          |  |                                                |      |  |     |         |  |                             |         |  |                       |                 |  |              |                |  |                             |               |  |                        |                                                                                                                                                                                                                                                                                                         |  |               |                |  |                                      |               |  |         |                                                                                                                                                                                                                                                                                                                                    |  |                              |     |  |                        |                 |  |               |                |  |         |               |  |         |                                                                                                                                                                                                                                                                                                                                                                                                                                                                                                                                          |
| Adj. R-Square                                                                                                                                                                                                                                                                                                                                                                                                                                                                                                                                                                                                                                                                                                                                                                                                                                                                                                                                                                                                                                                                                                                                                                                                                                                                                                                                                      |                                                                                  | 0.99998                                        |                   |          |  |                                                |      |  |     |         |  |                             |         |  |                       |                 |  |              |                |  |                             |               |  |                        |                                                                                                                                                                                                                                                                                                         |  |               |                |  |                                      |               |  |         |                                                                                                                                                                                                                                                                                                                                    |  |                              |     |  |                        |                 |  |               |                |  |         |               |  |         |                                                                                                                                                                                                                                                                                                                                                                                                                                                                                                                                          |
| <table border="1" data-bbox="518 1030 710 1187"> <thead> <tr> <th colspan="2">Model</th> <th>Orbach_QTM (User)</th> </tr> </thead> <tbody> <tr> <td>Equation</td> <td></td> <td><math>1/(B(1 + B^2 + \tau_0^2) \exp(-\Delta E/kT))</math></td> </tr> <tr> <td>Plot</td> <td></td> <td>Tau</td> </tr> <tr> <td>H</td> <td></td> <td><math>1000 \pm 0</math></td> </tr> <tr> <td>B1</td> <td></td> <td><math>77.7719 \pm 2.23014</math></td> </tr> <tr> <td>B2</td> <td></td> <td><math>0 \pm 0</math></td> </tr> <tr> <td>Tau0</td> <td></td> <td><math>2.52903E-6 \pm 5.73543E-7</math></td> </tr> <tr> <td>Urb</td> <td></td> <td><math>19.66369 \pm 0.60942</math></td> </tr> <tr> <td>Reduced Chi-Sqr</td> <td></td> <td><math>9.81864E-9</math></td> </tr> <tr> <td>R-Square (COD)</td> <td></td> <td>0.99903</td> </tr> <tr> <td>Adj. R-Square</td> <td></td> <td>0.99888</td> </tr> </tbody> </table>                                                                                                                                                                                                                                                                                                                                                                                                                                                        | Model                                                                            |                                                | Orbach_QTM (User) | Equation |  | $1/(B(1 + B^2 + \tau_0^2) \exp(-\Delta E/kT))$ | Plot |  | Tau | H       |  | $1000 \pm 0$                | B1      |  | $77.7719 \pm 2.23014$ | B2              |  | $0 \pm 0$    | Tau0           |  | $2.52903E-6 \pm 5.73543E-7$ | Urb           |  | $19.66369 \pm 0.60942$ | Reduced Chi-Sqr                                                                                                                                                                                                                                                                                         |  | $9.81864E-9$  | R-Square (COD) |  | 0.99903                              | Adj. R-Square |  | 0.99888 | <p><b>Orbach+ QTM</b><br/> <math>\tau^{-1} = \tau_0^{-1} \cdot \exp(-\Delta E/kT) + B</math></p> <p><math>\Delta E/k = 19.7 \pm 0.6</math> K<br/> <math>\tau_0 = 2.5 \cdot 10^{-6} \pm 0.6 \cdot 10^{-6}</math> s<br/> <math>B = 78 \pm 2</math> s<sup>-1</sup><br/> <math>R^2 = 0.99903</math><br/> <i>Unsatisfactory fit</i></p> |  |                              |     |  |                        |                 |  |               |                |  |         |               |  |         |                                                                                                                                                                                                                                                                                                                                                                                                                                                                                                                                          |
| Model                                                                                                                                                                                                                                                                                                                                                                                                                                                                                                                                                                                                                                                                                                                                                                                                                                                                                                                                                                                                                                                                                                                                                                                                                                                                                                                                                              |                                                                                  | Orbach_QTM (User)                              |                   |          |  |                                                |      |  |     |         |  |                             |         |  |                       |                 |  |              |                |  |                             |               |  |                        |                                                                                                                                                                                                                                                                                                         |  |               |                |  |                                      |               |  |         |                                                                                                                                                                                                                                                                                                                                    |  |                              |     |  |                        |                 |  |               |                |  |         |               |  |         |                                                                                                                                                                                                                                                                                                                                                                                                                                                                                                                                          |
| Equation                                                                                                                                                                                                                                                                                                                                                                                                                                                                                                                                                                                                                                                                                                                                                                                                                                                                                                                                                                                                                                                                                                                                                                                                                                                                                                                                                           |                                                                                  | $1/(B(1 + B^2 + \tau_0^2) \exp(-\Delta E/kT))$ |                   |          |  |                                                |      |  |     |         |  |                             |         |  |                       |                 |  |              |                |  |                             |               |  |                        |                                                                                                                                                                                                                                                                                                         |  |               |                |  |                                      |               |  |         |                                                                                                                                                                                                                                                                                                                                    |  |                              |     |  |                        |                 |  |               |                |  |         |               |  |         |                                                                                                                                                                                                                                                                                                                                                                                                                                                                                                                                          |
| Plot                                                                                                                                                                                                                                                                                                                                                                                                                                                                                                                                                                                                                                                                                                                                                                                                                                                                                                                                                                                                                                                                                                                                                                                                                                                                                                                                                               |                                                                                  | Tau                                            |                   |          |  |                                                |      |  |     |         |  |                             |         |  |                       |                 |  |              |                |  |                             |               |  |                        |                                                                                                                                                                                                                                                                                                         |  |               |                |  |                                      |               |  |         |                                                                                                                                                                                                                                                                                                                                    |  |                              |     |  |                        |                 |  |               |                |  |         |               |  |         |                                                                                                                                                                                                                                                                                                                                                                                                                                                                                                                                          |
| H                                                                                                                                                                                                                                                                                                                                                                                                                                                                                                                                                                                                                                                                                                                                                                                                                                                                                                                                                                                                                                                                                                                                                                                                                                                                                                                                                                  |                                                                                  | $1000 \pm 0$                                   |                   |          |  |                                                |      |  |     |         |  |                             |         |  |                       |                 |  |              |                |  |                             |               |  |                        |                                                                                                                                                                                                                                                                                                         |  |               |                |  |                                      |               |  |         |                                                                                                                                                                                                                                                                                                                                    |  |                              |     |  |                        |                 |  |               |                |  |         |               |  |         |                                                                                                                                                                                                                                                                                                                                                                                                                                                                                                                                          |
| B1                                                                                                                                                                                                                                                                                                                                                                                                                                                                                                                                                                                                                                                                                                                                                                                                                                                                                                                                                                                                                                                                                                                                                                                                                                                                                                                                                                 |                                                                                  | $77.7719 \pm 2.23014$                          |                   |          |  |                                                |      |  |     |         |  |                             |         |  |                       |                 |  |              |                |  |                             |               |  |                        |                                                                                                                                                                                                                                                                                                         |  |               |                |  |                                      |               |  |         |                                                                                                                                                                                                                                                                                                                                    |  |                              |     |  |                        |                 |  |               |                |  |         |               |  |         |                                                                                                                                                                                                                                                                                                                                                                                                                                                                                                                                          |
| B2                                                                                                                                                                                                                                                                                                                                                                                                                                                                                                                                                                                                                                                                                                                                                                                                                                                                                                                                                                                                                                                                                                                                                                                                                                                                                                                                                                 |                                                                                  | $0 \pm 0$                                      |                   |          |  |                                                |      |  |     |         |  |                             |         |  |                       |                 |  |              |                |  |                             |               |  |                        |                                                                                                                                                                                                                                                                                                         |  |               |                |  |                                      |               |  |         |                                                                                                                                                                                                                                                                                                                                    |  |                              |     |  |                        |                 |  |               |                |  |         |               |  |         |                                                                                                                                                                                                                                                                                                                                                                                                                                                                                                                                          |
| Tau0                                                                                                                                                                                                                                                                                                                                                                                                                                                                                                                                                                                                                                                                                                                                                                                                                                                                                                                                                                                                                                                                                                                                                                                                                                                                                                                                                               |                                                                                  | $2.52903E-6 \pm 5.73543E-7$                    |                   |          |  |                                                |      |  |     |         |  |                             |         |  |                       |                 |  |              |                |  |                             |               |  |                        |                                                                                                                                                                                                                                                                                                         |  |               |                |  |                                      |               |  |         |                                                                                                                                                                                                                                                                                                                                    |  |                              |     |  |                        |                 |  |               |                |  |         |               |  |         |                                                                                                                                                                                                                                                                                                                                                                                                                                                                                                                                          |
| Urb                                                                                                                                                                                                                                                                                                                                                                                                                                                                                                                                                                                                                                                                                                                                                                                                                                                                                                                                                                                                                                                                                                                                                                                                                                                                                                                                                                |                                                                                  | $19.66369 \pm 0.60942$                         |                   |          |  |                                                |      |  |     |         |  |                             |         |  |                       |                 |  |              |                |  |                             |               |  |                        |                                                                                                                                                                                                                                                                                                         |  |               |                |  |                                      |               |  |         |                                                                                                                                                                                                                                                                                                                                    |  |                              |     |  |                        |                 |  |               |                |  |         |               |  |         |                                                                                                                                                                                                                                                                                                                                                                                                                                                                                                                                          |
| Reduced Chi-Sqr                                                                                                                                                                                                                                                                                                                                                                                                                                                                                                                                                                                                                                                                                                                                                                                                                                                                                                                                                                                                                                                                                                                                                                                                                                                                                                                                                    |                                                                                  | $9.81864E-9$                                   |                   |          |  |                                                |      |  |     |         |  |                             |         |  |                       |                 |  |              |                |  |                             |               |  |                        |                                                                                                                                                                                                                                                                                                         |  |               |                |  |                                      |               |  |         |                                                                                                                                                                                                                                                                                                                                    |  |                              |     |  |                        |                 |  |               |                |  |         |               |  |         |                                                                                                                                                                                                                                                                                                                                                                                                                                                                                                                                          |
| R-Square (COD)                                                                                                                                                                                                                                                                                                                                                                                                                                                                                                                                                                                                                                                                                                                                                                                                                                                                                                                                                                                                                                                                                                                                                                                                                                                                                                                                                     |                                                                                  | 0.99903                                        |                   |          |  |                                                |      |  |     |         |  |                             |         |  |                       |                 |  |              |                |  |                             |               |  |                        |                                                                                                                                                                                                                                                                                                         |  |               |                |  |                                      |               |  |         |                                                                                                                                                                                                                                                                                                                                    |  |                              |     |  |                        |                 |  |               |                |  |         |               |  |         |                                                                                                                                                                                                                                                                                                                                                                                                                                                                                                                                          |
| Adj. R-Square                                                                                                                                                                                                                                                                                                                                                                                                                                                                                                                                                                                                                                                                                                                                                                                                                                                                                                                                                                                                                                                                                                                                                                                                                                                                                                                                                      |                                                                                  | 0.99888                                        |                   |          |  |                                                |      |  |     |         |  |                             |         |  |                       |                 |  |              |                |  |                             |               |  |                        |                                                                                                                                                                                                                                                                                                         |  |               |                |  |                                      |               |  |         |                                                                                                                                                                                                                                                                                                                                    |  |                              |     |  |                        |                 |  |               |                |  |         |               |  |         |                                                                                                                                                                                                                                                                                                                                                                                                                                                                                                                                          |
| <table border="1" data-bbox="502 1478 710 1635"> <thead> <tr> <th colspan="2">Model</th> <th>Raman (User)</th> </tr> </thead> <tbody> <tr> <td>Equation</td> <td></td> <td><math>1/(C_{\text{Raman}}(T)^{n_{\text{Raman}}})</math></td> </tr> <tr> <td>Plot</td> <td></td> <td>Tau</td> </tr> <tr> <td>C_raman</td> <td></td> <td><math>4.60972 \pm 0.65487</math></td> </tr> <tr> <td>n_raman</td> <td></td> <td><math>4.36183 \pm 0.18298</math></td> </tr> <tr> <td>Reduced Chi-Sqr</td> <td></td> <td><math>8.86406E-8</math></td> </tr> <tr> <td>R-Square (CO)</td> <td></td> <td>0.99054</td> </tr> <tr> <td>Adj. R-Square</td> <td></td> <td>0.98987</td> </tr> </tbody> </table>                                                                                                                                                                                                                                                                                                                                                                                                                                                                                                                                                                                                                                                                           | Model                                                                            |                                                | Raman (User)      | Equation |  | $1/(C_{\text{Raman}}(T)^{n_{\text{Raman}}})$   | Plot |  | Tau | C_raman |  | $4.60972 \pm 0.65487$       | n_raman |  | $4.36183 \pm 0.18298$ | Reduced Chi-Sqr |  | $8.86406E-8$ | R-Square (CO)  |  | 0.99054                     | Adj. R-Square |  | 0.98987                | <p><b>Raman</b><br/> <math>\tau^{-1} = C_{\text{Raman}} T^{n_{\text{Raman}}}</math></p> <p><math>C_{\text{Raman}} = 4.6 \pm 0.7</math> s<sup>-1</sup>K<sup>-n<sub>Raman</sub></sup><br/> <math>n_{\text{Raman}} = 4.4 \pm 0.2</math><br/> <math>R^2 = 0.99054</math><br/> <i>Unsatisfactory fit</i></p> |  |               |                |  |                                      |               |  |         |                                                                                                                                                                                                                                                                                                                                    |  |                              |     |  |                        |                 |  |               |                |  |         |               |  |         |                                                                                                                                                                                                                                                                                                                                                                                                                                                                                                                                          |
| Model                                                                                                                                                                                                                                                                                                                                                                                                                                                                                                                                                                                                                                                                                                                                                                                                                                                                                                                                                                                                                                                                                                                                                                                                                                                                                                                                                              |                                                                                  | Raman (User)                                   |                   |          |  |                                                |      |  |     |         |  |                             |         |  |                       |                 |  |              |                |  |                             |               |  |                        |                                                                                                                                                                                                                                                                                                         |  |               |                |  |                                      |               |  |         |                                                                                                                                                                                                                                                                                                                                    |  |                              |     |  |                        |                 |  |               |                |  |         |               |  |         |                                                                                                                                                                                                                                                                                                                                                                                                                                                                                                                                          |
| Equation                                                                                                                                                                                                                                                                                                                                                                                                                                                                                                                                                                                                                                                                                                                                                                                                                                                                                                                                                                                                                                                                                                                                                                                                                                                                                                                                                           |                                                                                  | $1/(C_{\text{Raman}}(T)^{n_{\text{Raman}}})$   |                   |          |  |                                                |      |  |     |         |  |                             |         |  |                       |                 |  |              |                |  |                             |               |  |                        |                                                                                                                                                                                                                                                                                                         |  |               |                |  |                                      |               |  |         |                                                                                                                                                                                                                                                                                                                                    |  |                              |     |  |                        |                 |  |               |                |  |         |               |  |         |                                                                                                                                                                                                                                                                                                                                                                                                                                                                                                                                          |
| Plot                                                                                                                                                                                                                                                                                                                                                                                                                                                                                                                                                                                                                                                                                                                                                                                                                                                                                                                                                                                                                                                                                                                                                                                                                                                                                                                                                               |                                                                                  | Tau                                            |                   |          |  |                                                |      |  |     |         |  |                             |         |  |                       |                 |  |              |                |  |                             |               |  |                        |                                                                                                                                                                                                                                                                                                         |  |               |                |  |                                      |               |  |         |                                                                                                                                                                                                                                                                                                                                    |  |                              |     |  |                        |                 |  |               |                |  |         |               |  |         |                                                                                                                                                                                                                                                                                                                                                                                                                                                                                                                                          |
| C_raman                                                                                                                                                                                                                                                                                                                                                                                                                                                                                                                                                                                                                                                                                                                                                                                                                                                                                                                                                                                                                                                                                                                                                                                                                                                                                                                                                            |                                                                                  | $4.60972 \pm 0.65487$                          |                   |          |  |                                                |      |  |     |         |  |                             |         |  |                       |                 |  |              |                |  |                             |               |  |                        |                                                                                                                                                                                                                                                                                                         |  |               |                |  |                                      |               |  |         |                                                                                                                                                                                                                                                                                                                                    |  |                              |     |  |                        |                 |  |               |                |  |         |               |  |         |                                                                                                                                                                                                                                                                                                                                                                                                                                                                                                                                          |
| n_raman                                                                                                                                                                                                                                                                                                                                                                                                                                                                                                                                                                                                                                                                                                                                                                                                                                                                                                                                                                                                                                                                                                                                                                                                                                                                                                                                                            |                                                                                  | $4.36183 \pm 0.18298$                          |                   |          |  |                                                |      |  |     |         |  |                             |         |  |                       |                 |  |              |                |  |                             |               |  |                        |                                                                                                                                                                                                                                                                                                         |  |               |                |  |                                      |               |  |         |                                                                                                                                                                                                                                                                                                                                    |  |                              |     |  |                        |                 |  |               |                |  |         |               |  |         |                                                                                                                                                                                                                                                                                                                                                                                                                                                                                                                                          |
| Reduced Chi-Sqr                                                                                                                                                                                                                                                                                                                                                                                                                                                                                                                                                                                                                                                                                                                                                                                                                                                                                                                                                                                                                                                                                                                                                                                                                                                                                                                                                    |                                                                                  | $8.86406E-8$                                   |                   |          |  |                                                |      |  |     |         |  |                             |         |  |                       |                 |  |              |                |  |                             |               |  |                        |                                                                                                                                                                                                                                                                                                         |  |               |                |  |                                      |               |  |         |                                                                                                                                                                                                                                                                                                                                    |  |                              |     |  |                        |                 |  |               |                |  |         |               |  |         |                                                                                                                                                                                                                                                                                                                                                                                                                                                                                                                                          |
| R-Square (CO)                                                                                                                                                                                                                                                                                                                                                                                                                                                                                                                                                                                                                                                                                                                                                                                                                                                                                                                                                                                                                                                                                                                                                                                                                                                                                                                                                      |                                                                                  | 0.99054                                        |                   |          |  |                                                |      |  |     |         |  |                             |         |  |                       |                 |  |              |                |  |                             |               |  |                        |                                                                                                                                                                                                                                                                                                         |  |               |                |  |                                      |               |  |         |                                                                                                                                                                                                                                                                                                                                    |  |                              |     |  |                        |                 |  |               |                |  |         |               |  |         |                                                                                                                                                                                                                                                                                                                                                                                                                                                                                                                                          |
| Adj. R-Square                                                                                                                                                                                                                                                                                                                                                                                                                                                                                                                                                                                                                                                                                                                                                                                                                                                                                                                                                                                                                                                                                                                                                                                                                                                                                                                                                      |                                                                                  | 0.98987                                        |                   |          |  |                                                |      |  |     |         |  |                             |         |  |                       |                 |  |              |                |  |                             |               |  |                        |                                                                                                                                                                                                                                                                                                         |  |               |                |  |                                      |               |  |         |                                                                                                                                                                                                                                                                                                                                    |  |                              |     |  |                        |                 |  |               |                |  |         |               |  |         |                                                                                                                                                                                                                                                                                                                                                                                                                                                                                                                                          |

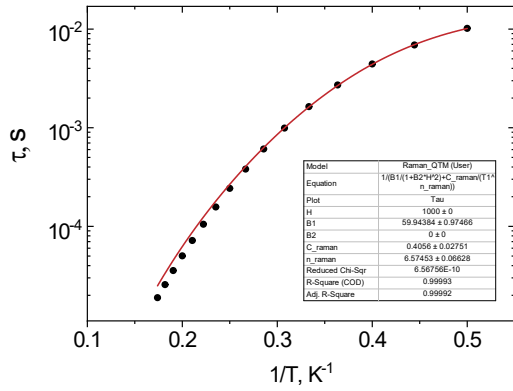

### Raman+ QTM

$$\tau^{-1} = C_{\text{Raman}} T^{n_{\text{Raman}}} + B$$

$$C_{\text{Raman}} = 0.41 \pm 0.03 \text{ s}^{-1} \text{K}^{-n_{\text{Raman}}}$$

$$n_{\text{Raman}} = 6.57 \pm 0.07$$

$$B = 59.9 \pm 1.0 \text{ s}^{-1}$$

$$R^2 = 0.99993$$

*Unsatisfactory fit*

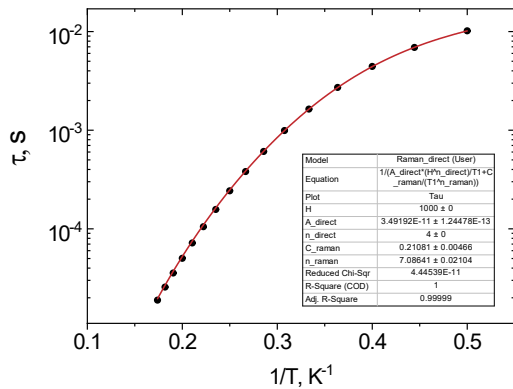

### Raman+Direct

$$\tau^{-1} = C_{\text{Raman}} T^{n_{\text{Raman}}} + A_{\text{direct}} T H^4$$

$$C_{\text{Raman}} = 0.211 \pm 0.005 \text{ s}^{-1} \text{K}^{-n_{\text{Raman}}}$$

$$n_{\text{Raman}} = 7.09 \pm 0.02$$

$$A_{\text{direct}} = 3.49 \cdot 10^{-11} \pm 0.01 \cdot 10^{-11} \text{ K}^{-1} \text{Oe}^{-4} \text{ s}^{-1}$$

$$R^2 = 1$$

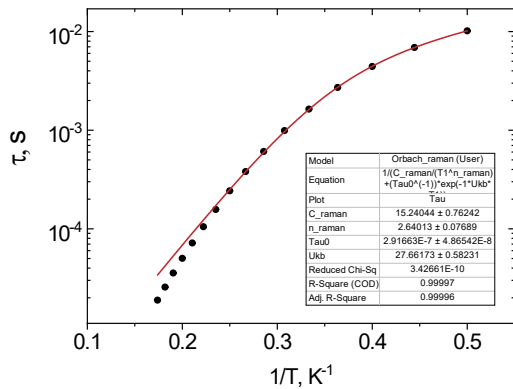

### Orbach+Raman

$$\tau^{-1} = \tau_0^{-1} \cdot \exp(-\Delta E/kT) + C_{\text{Raman}} T^{n_{\text{Raman}}}$$

$$\Delta E/k = 27.7 \pm 0.6 \text{ K}$$

$$\tau_0 = 2.9 \cdot 10^{-7} \pm 0.5 \cdot 10^{-7} \text{ s}$$

$$C_{\text{Raman}} = 15.2 \pm 0.8 \text{ s}^{-1} \text{K}^{-n_{\text{Raman}}}$$

$$n_{\text{Raman}} = 2.64 \pm 0.08$$

$$R^2 = 0.99997$$

*Unsatisfactory fit*

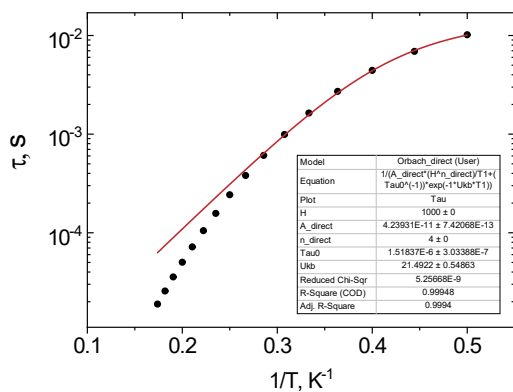

### Orbach+Direct

$$\tau^{-1} = \tau_0^{-1} \cdot \exp(-\Delta E/kT) + A_{\text{direct}} T H^4$$

$$\Delta E/k = 21.5 \pm 0.5 \text{ K}$$

$$\tau_0 = 1.5 \cdot 10^{-6} \pm 0.3 \cdot 10^{-6} \text{ s}$$

$$A_{\text{direct}} = 4.24 \cdot 10^{-11} \pm 0.07 \cdot 10^{-11} \text{ K}^{-1} \text{Oe}^{-4} \text{ s}^{-1}$$

$$R^2 = 0.99948$$

*Unsatisfactory fit*

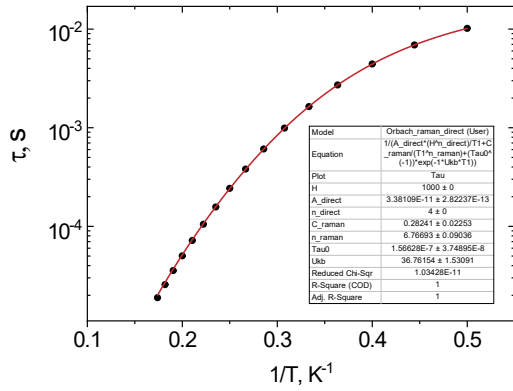

### Orbach+Raman+Direct

$$\tau^{-1} = \tau_0^{-1} \cdot \exp(-\Delta E/kT) + C_{\text{Raman}} T^{n_{\text{Raman}}} + A_{\text{direct}} T H^4$$

$$\Delta E/k = 37 \pm 2 \text{ K}$$

$$\tau_0 = 1.6 \cdot 10^{-7} \pm 0.4 \cdot 10^{-7} \text{ s}$$

$$C_{\text{Raman}} = 0.28 \pm 0.02 \text{ s}^{-1} \text{ K}^{-n_{\text{Raman}}}$$

$$n_{\text{Raman}} = 6.77 \pm 0.09$$

$$A_{\text{direct}} = 3.38 \cdot 10^{-11} \pm 0.03 \cdot 10^{-11} \text{ K}^{-1} \text{ Oe}^{-4} \text{ s}^{-1}$$

$$R^2 = 1$$

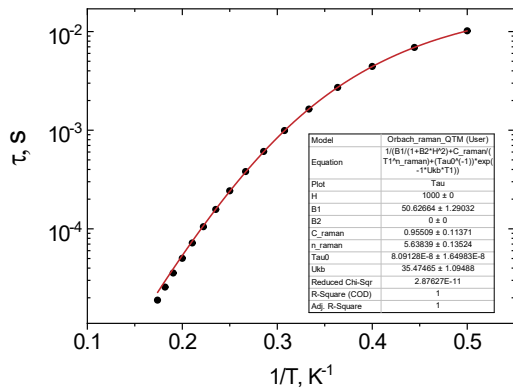

### Orbach+Raman+QTM

$$\tau^{-1} = \tau_0^{-1} \cdot \exp(-\Delta E/kT) + C_{\text{Raman}} T^{n_{\text{Raman}}} + B$$

$$\Delta E/k = 35 \pm 1 \text{ K}$$

$$\tau_0 = 8 \cdot 10^{-8} \pm 2 \cdot 10^{-8} \text{ s}$$

$$C_{\text{Raman}} = 0.96 \pm 0.11 \text{ s}^{-1} \text{ K}^{-n_{\text{Raman}}}$$

$$n_{\text{Raman}} = 5.6 \pm 0.1$$

$$B = 51 \pm 1 \text{ s}^{-1}$$

$$R^2 = 1$$
